# Supplementary material for: Impact of Physician Follow-Up Care on Psychiatric Readmission Rates in a Population-Based Sample of Patients With Schizophrenia
Source: Atypon-hosted journal article supplement (doi:10.1176/appi.ps.201600507), 2017-09-01
Supplement: appi.ps.201600507.ds001.pdf [file appi.ps.201600507.ds001.pdf]

### Appendix Figure 1: Cohort Creation Flow Chart

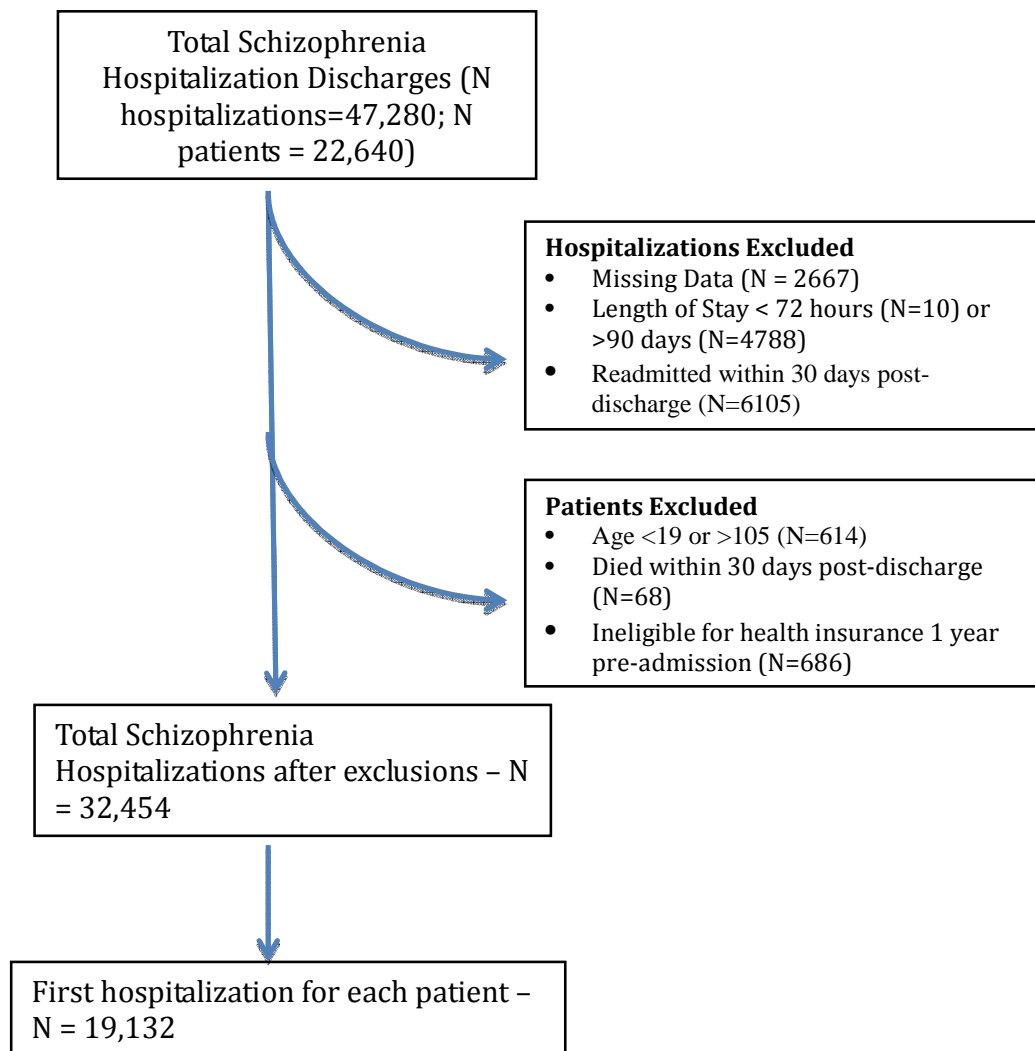

**Appendix Table 1: Baseline Characteristics Comparing Included Individuals Discharged with a Diagnosis of Schizophrenia\* versus those excluded.**

| Follow-up group                                             | Excluded (N=3,508) |      | Included (N=19,132) |      | Total (N=22,640) |      |
|-------------------------------------------------------------|--------------------|------|---------------------|------|------------------|------|
|                                                             | N                  | %    | N                   | %    | N                | %    |
| <b>READMIT Score at Discharge, mean (SD)</b>                | 18.69              | 4.55 | 20.34               | 4.20 | 20.08            | 4.30 |
| <b>READMIT Risk Tertiles,</b>                               |                    |      |                     |      |                  |      |
| <i>Low Readmission Risk (0-14)</i>                          | 619                | 18   | 1,495               | 8    | 2,114            | 9    |
| <i>Medium Readmission Risk (15-18)</i>                      | 1,113              | 32   | 4,991               | 26   | 6,104            | 27   |
| <i>High Readmission Risk (19 and over)</i>                  | 1,775              | 51   | 12,646              | 66   | 14,421           | 64   |
| <b>Sociodemographics</b>                                    |                    |      |                     |      |                  |      |
| <i>Female sex,</i>                                          | 1,284              | 37   | 7,775               | 41   | 9,059            | 40   |
| <i>Age:</i>                                                 |                    |      |                     |      |                  |      |
| ≤18                                                         | 342                | 10   | 0                   | 0    | 342              | 2    |
| 19 to 39                                                    | 1,441              | 41   | 8,992               | 47   | 10,433           | 46   |
| 40 to 64                                                    | 1,393              | 40   | 9,027               | 47   | 10,420           | 46   |
| ≥ 65                                                        | 332                | 9    | 1,113               | 6    | 1,445            | 6    |
| <i>Neighbourhood Income Quintile (Q), Q1 or Q2 (lowest)</i> | 1,196              | 34   | 7,206               | 38   | 8,402            | 37   |
| <i>Urban Residence</i>                                      | 3178               | 91   | 18,051              | 94   | 21,229           | 94   |
| <b>Health care utilization prior to admission</b>           |                    |      |                     |      |                  |      |
| <i>Any primary care visit within 6 months</i>               | 2,113              | 60   | 12,968              | 68   | 15,081           | 66   |
| <i>Primary Care - Mental Health</i>                         | 1,311              | 37   | 7,945               | 42   | 9,256            | 41   |
| <i>Primary Care - Non-mental Health</i>                     | 1,673              | 48   | 10,392              | 54   | 12,065           | 53   |
| <i>Any psychiatrist visit within 6 months</i>               | 1,681              | 48   | 10,606              | 55   | 12,287           | 54   |
| <i>Any emergency department visit within 12 months</i>      | 2,097              | 60   | 12,576              | 66   | 14,673           | 65   |
| <i>Any psychiatric hospitalization within 12 months</i>     | 871                | 25   | 5,530               | 29   | 6,401            | 28   |

**Johns Hopkins cADGs**

|                                   |      |      |      |      |      |      |
|-----------------------------------|------|------|------|------|------|------|
| <i>Number of cADGs, mean (SD)</i> | 2.72 | 1.91 | 3.08 | 1.79 | 3.02 | 1.82 |
|-----------------------------------|------|------|------|------|------|------|

**Index hospitalization variables**

|                                                        |    |        |    |       |    |       |
|--------------------------------------------------------|----|--------|----|-------|----|-------|
| <i>Index Hospitalization LOS, median in days (IQR)</i> | 80 | 16-178 | 18 | 11-32 | 20 | 11-39 |
|--------------------------------------------------------|----|--------|----|-------|----|-------|

|                                          |       |       |       |       |       |       |
|------------------------------------------|-------|-------|-------|-------|-------|-------|
| <i>GAF Score at discharge, mean (SD)</i> | 50.66 | 15.51 | 54.44 | 12.94 | 53.86 | 13.44 |
|------------------------------------------|-------|-------|-------|-------|-------|-------|

*Symptom severity and psychosocial function at discharge*

| Aggressive Behaviour Scale                 |       |    |        |    |        |    |
|--------------------------------------------|-------|----|--------|----|--------|----|
| 0                                          | 2,652 | 77 | 15,753 | 82 | 18,405 | 82 |
| 1                                          | 201   | 6  | 784    | 4  | 985    | 4  |
| 2                                          | 230   | 7  | 1,141  | 6  | 1,371  | 6  |
| 3+                                         | 374   | 11 | 1,454  | 8  | 1,828  | 8  |
| Cognitive Performance Scale (higher=worse) |       |    |        |    |        |    |
| 0                                          | 2,119 | 62 | 12,611 | 66 | 14,730 | 65 |
| 1                                          | 715   | 21 | 4,108  | 22 | 4,823  | 21 |
| 2                                          | 316   | 9  | 1,676  | 9  | 1,992  | 9  |
| 3+                                         | 273   | 8  | 737    | 4  | 1,010  | 5  |
| Depression Rating Scale (higher=worse)     |       |    |        |    |        |    |
| 0                                          | 1,772 | 50 | 11,138 | 58 | 12,860 | 57 |
| 1                                          | 539   | 16 | 2,721  | 14 | 3,260  | 14 |
| 2                                          | 467   | 14 | 2,500  | 13 | 2,967  | 13 |
| 3+                                         | 726   | 21 | 2,773  | 15 | 3,499  | 16 |
| Total # positive symptoms                  |       |    |        |    |        |    |
| 0                                          | 1,801 | 52 | 10,123 | 53 | 11,924 | 53 |
| 1                                          | 655   | 19 | 3,927  | 21 | 4,582  | 20 |
| 2                                          | 616   | 18 | 3,054  | 16 | 3,670  | 16 |
| 3+                                         | 382   | 11 | 2,028  | 11 | 2,410  | 11 |
| Total # negative symptoms                  |       |    |        |    |        |    |
| 0                                          | 2,253 | 65 | 12,270 | 64 | 14,523 | 64 |
| 1                                          | 477   | 14 | 2,957  | 16 | 3,434  | 15 |

|                                               |       |    |        |    |        |    |
|-----------------------------------------------|-------|----|--------|----|--------|----|
| 2                                             | 268   | 8  | 1,544  | 8  | 1,812  | 8  |
| 3+                                            | 456   | 13 | 2,361  | 12 | 2,817  | 12 |
| CAGE scale                                    |       |    |        |    |        |    |
| 0                                             | 2,996 | 87 | 16,653 | 7  | 19,649 | 87 |
| 1                                             | 168   | 5  | 878    | 5  | 1,046  | 5  |
| 2                                             | 161   | 5  | 857    | 5  | 1,018  | 5  |
| 3+                                            | 109   | 3  | 744    | 4  | 853    | 4  |
| Suicidal behaviours                           | 662   | 19 | 4,763  | 25 | 5,425  | 24 |
| Activity of Daily Living Scale (higher=worse) |       |    |        |    |        |    |
| 0                                             | 2,955 | 85 | 17,538 | 92 | 20,493 | 91 |
| 1                                             | 211   | 6  | 791    | 4  | 1,002  | 4  |
| 2                                             | 131   | 4  | 406    | 2  | 537    | 2  |
| 3+                                            | 163   | 5  | 397    | 2  | 560    | 3  |

---

**Appendix Table 2: Baseline Characteristics of Individuals Readmitted in the 30 Days Preceding Index admission versus Individuals without readmission.**

| Follow-up group                                             | Readmitted in 30<br>(N=1,559) |      | No Readmission<br>(N=17,573) |      | Total (N=19,132) |      |
|-------------------------------------------------------------|-------------------------------|------|------------------------------|------|------------------|------|
|                                                             | N                             | %    | N                            | %    | N                | %    |
| <b>READMIT Score at Discharge, mean (SD)</b>                | 22.43                         | 4.13 | 20.15                        | 4.16 | 20.34            | 4.20 |
| <b>READMIT Risk Tertiles,</b>                               |                               |      |                              |      |                  |      |
| <i>Low Readmission Risk (0-14)</i>                          | 38                            | 2    | 1,457                        | 8    | 1,495            | 8    |
| <i>Medium Readmission Risk (15-18)</i>                      | 233                           | 145  | 4,758                        | 27   | 4,991            | 26   |
| <i>High Readmission Risk (19 and over)</i>                  | 1,288                         | 83   | 11,358                       | 65   | 12,646           | 66   |
| <b>Sociodemographics</b>                                    |                               |      |                              |      |                  |      |
| <i>Female sex,</i>                                          | 594                           | 38   | 7,181                        | 41   | 7,775            | 41   |
| <i>Age:</i>                                                 |                               |      |                              |      |                  |      |
| 19 to 39                                                    | 812                           | 52   | 8,180                        | 47   | 8,992            | 47   |
| 40 to 64                                                    | 678                           | 44   | 8,349                        | 48   | 9,027            | 47   |
| ≥ 65                                                        | 69                            | 4    | 1,044                        | 6    | 1,113            | 6    |
| <i>Neighbourhood Income Quintile (Q), Q1 or Q2 (lowest)</i> | 609                           | 39   | 6,597                        | 38   | 7,206            | 38   |
| <i>Urban Residence</i>                                      | 1,474                         | 95   | 16,577                       | 94   | 18,051           | 94   |
| <b>Health care utilization prior to admission</b>           |                               |      |                              |      |                  |      |
| <i>Any primary care visit within 6 months</i>               | 1,048                         | 67   | 11,920                       | 68   | 12,968           | 68   |
| <i>Primary Care - Mental Health</i>                         | 674                           | 43   | 7,271                        | 41   | 7,945            | 42   |
| <i>Primary Care - Non-mental Health</i>                     | 820                           | 53   | 9,572                        | 55   | 10,392           | 54   |
| <i>Any psychiatrist visit within 6 months</i>               | 1,197                         | 77   | 9,409                        | 54   | 10,606           | 55   |
| <i>Any emergency department visit within 12 months</i>      | 1,480                         | 95   | 11,096                       | 63   | 12,576           | 66   |
| <i>Any psychiatric hospitalization within 12 months</i>     | 1,552                         | 100  | 2,441                        | 14   | 3,993            | 21   |

**Johns Hopkins cADGs**

|                                   |      |      |      |      |      |      |
|-----------------------------------|------|------|------|------|------|------|
| <i>Number of cADGs, mean (SD)</i> | 3.16 | 1.73 | 3.07 | 1.80 | 3.08 | 1.79 |
|-----------------------------------|------|------|------|------|------|------|

**Index hospitalization variables**

|                                                        |    |       |    |       |    |       |
|--------------------------------------------------------|----|-------|----|-------|----|-------|
| <i>Index Hospitalization LOS, median in days (IQR)</i> | 20 | 12-37 | 18 | 11-32 | 18 | 11-32 |
|--------------------------------------------------------|----|-------|----|-------|----|-------|

|                                          |       |       |       |       |       |       |
|------------------------------------------|-------|-------|-------|-------|-------|-------|
| <i>GAF Score at discharge, mean (SD)</i> | 53.70 | 12.29 | 54.51 | 13.00 | 54.44 | 12.94 |
|------------------------------------------|-------|-------|-------|-------|-------|-------|

*Symptom severity and psychosocial function at discharge*

## Aggressive Behaviour Scale

|   |       |    |        |    |        |    |
|---|-------|----|--------|----|--------|----|
| 0 | 1,216 | 78 | 14,537 | 83 | 15,753 | 82 |
|---|-------|----|--------|----|--------|----|

|   |    |   |     |   |     |   |
|---|----|---|-----|---|-----|---|
| 1 | 74 | 5 | 710 | 4 | 784 | 4 |
|---|----|---|-----|---|-----|---|

|   |     |   |       |   |       |   |
|---|-----|---|-------|---|-------|---|
| 2 | 121 | 8 | 1,020 | 6 | 1,141 | 6 |
|---|-----|---|-------|---|-------|---|

|    |     |    |       |   |       |   |
|----|-----|----|-------|---|-------|---|
| 3+ | 148 | 10 | 1,306 | 7 | 1,454 | 8 |
|----|-----|----|-------|---|-------|---|

## Cognitive Performance Scale (higher=worse)

|   |     |    |        |    |        |    |
|---|-----|----|--------|----|--------|----|
| 0 | 985 | 63 | 11,626 | 66 | 12,611 | 66 |
|---|-----|----|--------|----|--------|----|

|   |     |    |       |    |       |    |
|---|-----|----|-------|----|-------|----|
| 1 | 375 | 24 | 3,733 | 21 | 4,108 | 22 |
|---|-----|----|-------|----|-------|----|

|   |     |   |       |   |       |   |
|---|-----|---|-------|---|-------|---|
| 2 | 142 | 9 | 1,534 | 9 | 1,676 | 9 |
|---|-----|---|-------|---|-------|---|

|    |    |   |     |   |     |   |
|----|----|---|-----|---|-----|---|
| 3+ | 57 | 4 | 680 | 4 | 737 | 4 |
|----|----|---|-----|---|-----|---|

## Depression Rating Scale (higher=worse)

|   |     |    |        |    |        |    |
|---|-----|----|--------|----|--------|----|
| 0 | 933 | 60 | 10,205 | 58 | 11,138 | 58 |
|---|-----|----|--------|----|--------|----|

|   |     |    |       |    |       |    |
|---|-----|----|-------|----|-------|----|
| 1 | 214 | 14 | 2,507 | 14 | 2,721 | 14 |
|---|-----|----|-------|----|-------|----|

|   |     |    |       |    |       |    |
|---|-----|----|-------|----|-------|----|
| 2 | 208 | 13 | 2,292 | 13 | 2,500 | 13 |
|---|-----|----|-------|----|-------|----|

|    |     |    |       |    |       |    |
|----|-----|----|-------|----|-------|----|
| 3+ | 204 | 13 | 2,569 | 15 | 2,773 | 15 |
|----|-----|----|-------|----|-------|----|

## Total # positive symptoms

|   |     |    |       |    |        |    |
|---|-----|----|-------|----|--------|----|
| 0 | 821 | 53 | 9,302 | 53 | 10,123 | 53 |
|---|-----|----|-------|----|--------|----|

|   |     |    |       |    |       |    |
|---|-----|----|-------|----|-------|----|
| 1 | 320 | 21 | 3,607 | 21 | 3,927 | 21 |
|---|-----|----|-------|----|-------|----|

|   |     |    |       |    |       |    |
|---|-----|----|-------|----|-------|----|
| 2 | 257 | 17 | 2,797 | 16 | 3,054 | 16 |
|---|-----|----|-------|----|-------|----|

|    |     |    |       |    |       |    |
|----|-----|----|-------|----|-------|----|
| 3+ | 161 | 10 | 1,867 | 11 | 2,028 | 11 |
|----|-----|----|-------|----|-------|----|

## Total # negative symptoms

|   |       |    |        |    |        |    |
|---|-------|----|--------|----|--------|----|
| 0 | 1,012 | 65 | 11,258 | 64 | 12,270 | 64 |
|---|-------|----|--------|----|--------|----|

|   |     |    |       |    |       |    |
|---|-----|----|-------|----|-------|----|
| 1 | 236 | 15 | 2,721 | 16 | 2,957 | 16 |
|---|-----|----|-------|----|-------|----|

|                                               |       |    |        |    |        |    |
|-----------------------------------------------|-------|----|--------|----|--------|----|
| 2                                             | 127   | 8  | 1,417  | 8  | 1,544  | 8  |
| 3+                                            | 184   | 12 | 2,177  | 12 | 2,361  | 12 |
| CAGE scale                                    |       |    |        |    |        |    |
| 0                                             | 1,343 | 86 | 15,310 | 87 | 16,653 | 87 |
| 1                                             | 71    | 5  | 807    | 5  | 878    | 5  |
| 2                                             | 79    | 5  | 778    | 4  | 857    | 55 |
| 3+                                            | 66    | 4  | 678    | 4  | 744    | 4  |
| Suicidal behaviours, N (%)                    | 395   | 25 | 4,368  | 25 | 4,763  | 25 |
| Activity of Daily Living Scale (higher=worse) |       |    |        |    |        |    |
| 0                                             | 1,405 | 90 | 16,133 | 92 | 17,538 | 92 |
| 1                                             | 79    | 5  | 712    | 4  | 791    | 4  |
| 2                                             | 29    | 2  | 377    | 2  | 406    | 2  |
| 3+                                            | 46    | 3  | 351    | 2  | 397    | 2  |

---
